# Supplementary material for: TBK1: a new player in ALS linking autophagy and neuroinflammation
Source: PubMed Central journal article supplement (PMC5288885; doi:10.1186/s13041-017-0287-x), 2017-02-02
Supplement: 13041_2017_287_MOESM1_ESM.pdf [file 13041_2017_287_MOESM1_ESM.pdf]

**Additional file 1: Table S1**

| Mutation       | Type of Variant | Location | Disease      | PolyPhen2 | SNPs3D | SIFT | Age of onset   | Survival Time | Refs            |
|----------------|-----------------|----------|--------------|-----------|--------|------|----------------|---------------|-----------------|
| p.Q2X          | Nonsense        | KD       | ALS, FTD     |           |        |      | 56             | 4             | [6, 19, 78, 79] |
| p.T4A          | Missense        | KD       | FTD          | 0.984     | -1.84  | 0.00 |                |               | [18, 78, 79]    |
| p.L11S         | Missense        | KD       | ALS          | 0.960     | -1.2   | 0.02 |                |               | [6, 78, 79]     |
| p.N22H         | Missense        | KD       | ALS          | 0.999     | -0.17  | 0.03 |                |               | [6, 78, 79]     |
| p.N22D         | Missense        | KD       | ALS          | 0.997     | -0.52  | 0.13 |                |               | [6, 78, 79]     |
| p.R25H         | Missense        | KD       | ALS          | 1.000     | 0.11   | 0.01 |                |               | [6, 78, 79]     |
| p.G26E         | Missense        | KD       | ALS          | 1.000     | -2.06  | 0.01 |                |               | [6, 18, 78, 79] |
| p.I43V         | Missense        | KD       | ALS          | 0.071     | 1.05   | 1.00 | 44             |               | [15, 79]        |
| p.R47H         | Missense        | KD       | ALS          | 1.000     | -2.39  | 0.00 |                |               | [7, 78, 79]     |
| p.L62P         | Missense        | KD       | ALS          | 0.999     | -3.11  | 0.00 | 47             | 2             | [16]            |
| p.T77WfsX4     | Splice          | KD       | ALS          |           |        |      | 35, 58         | 5, 3          | [7, 78, 79]     |
| p.Y105C        | Missense        | KD       | ALS, ALS-FTD | 0.938     | 0.35   | 0.00 |                |               | [6, 7, 78, 79]  |
| p.R117X        | Nonsense        | KD       | ALS          |           |        |      | 68             | 4             | [6, 20, 78, 79] |
| p.V120Afs      | Splice          | KD       | ALS          |           |        |      |                |               | [6, 79]         |
| p.N129D        | Missense        | KD       | ALS          | 0.906     | -2.23  | 0.06 |                |               | [6, 7, 79]      |
| p.V132E        | Missense        | KD       | ALS          | 0.992     | -3.51  | 0.00 |                |               | [6, 78, 79]     |
| p.R134H        | Missense        | KD       | ALS          | 1.000     | -3.08  | 0.00 |                |               | [6, 78, 79]     |
| p.R143C        | Missense        | KD       | ALS          | 1.000     | -0.29  | 0.00 |                |               | [18, 78, 79]    |
| p.S151C        | Missense        | KD       | ALS          | 0.999     | 0.34   | 0.00 |                |               | [6, 78, 79]     |
| p.S151F        | Missense        | KD       | ALS          | 0.997     | -1.03  | 0.00 |                |               | [6, 78, 79]     |
| p.T156RfsX6    | Deletion        | KD       | ALS-FTD      |           |        |      |                |               | [6, 18, 78, 79] |
| p.D167del      | Deletion        | KD       | ALS          |           |        |      | 60             | 1             | [19, 78, 79]    |
| p.180sp        | Splice          | KD       | ALS          |           |        |      |                |               | [6, 78]         |
| p.Y185X        | Nonsense        | KD       | ALS          |           |        |      | 47, 37, 41, 40 | 6, 3, 6, 3    | [7, 78, 79]     |
| p.G217R        | Missense        | KD       | ALS          | 1.000     | -3.42  | 0.00 |                |               | [6, 78, 79]     |
| p.R228H        | Missense        | KD       | ALS          | 1.000     | -2.05  | 0.00 |                |               | [6, 78, 79]     |
| p.I257T        | Missense        | KD       | ALS          | 0.991     | -1.84  | 0.01 |                |               | [6, 78, 79]     |
| p.R271L        | Missense        | KD       | ALS          | 0.001     | 1.47   | 0.32 | 80             | 7             | [19, 78, 79]    |
| p.G272_T331del | Splice          | KD       | ALS          |           |        |      |                |               | [6, 78, 79]     |
| p.G272_T331del | Splice          | KD       | FTD          |           |        |      |                |               | [19, 79]        |
| p.L277V        | Missense        | KD       | ALS          | 0.856     | 0.24   | 0.01 |                |               | [6, 78, 79]     |
| p.T278fs       | Frameshift      | KD       | ALS          |           |        |      |                |               | [6, 78]         |
| p.P279Cfs      | Deletion        | KD       | ALS          |           |        |      |                |               | [6, 79]         |
| p.K291E        | Missense        | KD       | FTD          | 0.997     | -1.8   | 0.01 | 60             | 4             | [19, 78, 79]    |
| p.G294D        | Missense        | KD       | ALS          | 1.000     | -0.09  | 0.01 | 46             |               | [15, 79]        |
| p.I305T        | Missense        | KD       | ALS          | 0.770     | -0.92  | 0.07 |                |               | [6, 7, 78, 79]  |
| p.L306I        | Missense        | KD       | ALS-FTD      | 0.749     | -1.21  | 0.02 | 70             | 2             | [6, 7, 78, 79]  |

| Mutation     | Type of Variant | Location | Disease           | PolyPhen2 | SNPs3D | SIFT | Age of onset               | Survival Time       | Refs               |
|--------------|-----------------|----------|-------------------|-----------|--------|------|----------------------------|---------------------|--------------------|
| p.R308Q      | Missense        | ULD      | ALS               | 0.999     | -0.01  | 0.07 | 38                         | 4                   | [7, 78, 79]        |
| p.T320QfsX40 | Deletion        | ULD      | ALS               |           |        |      | 60                         | 2                   | [7, 78, 79]        |
| p.T320I      | Missense        | ULD      | ALS               | 0.626     | -0.15  | 0.14 |                            |                     | [6, 18, 78, 79]    |
| p.H322Y      | Missense        | ULD      | ALS               | 0.982     | 0.65   | 0.14 | 64                         | 2                   | [19, 78, 79]       |
| p.331sp      | Splice          | ULD      | ALS               |           |        |      |                            |                     | [6, 78]            |
| p.T331I      | Missense        | ULD      | ALS               | 0.971     | -0.08  | 0.00 |                            |                     | [6, 78, 79]        |
| p.I334T      | Missense        | ULD      | ALS               | 0.002     | 1.94   | 0.84 | 51                         | 4                   | [16]               |
| p.T343S      | Missense        | ULD      | ALS               | 0.993     | -2.13  | 0.00 |                            |                     | [6, 78, 79]        |
| p.R357Q      | Missense        | ULD      | ALS               | 0.105     | 0.57   | 0.03 | 61                         | 3                   | [6, 7, 79]         |
| p.R357X      | Nonsense        | ULD      | ALS               |           |        |      |                            |                     | [6, 78, 79]        |
| p.R384T      | Missense        | ULD      | ALS               | 0.986     | 1.47   | 0.67 |                            | 2                   | [17]               |
| p.Y394D      | Missense        | ULD-CCD1 | ALS               | 0.940     | 1.57   | 0.09 |                            |                     | [6, 78, 79]        |
| p.S398PfsX11 | Deletion        | ULD-CCD1 | ALS               |           |        |      | 59                         | 5                   | [19, 78, 79]       |
| p.L399fs     | Frameshift      | ULD-CCD1 | ALS               |           |        |      | 62                         | 4                   | [6, 14, 78]        |
| p.P400Lfs    | Deletion        | ULD-CCD1 | ALS               |           |        |      |                            |                     | [14, 79]           |
| p.A417X      | Splice          | CCD1     | ALS, ALS-FTD      |           |        |      | 65, 56, 62                 | 7, 2, 6             | [7, 78, 79]        |
| P.V421fs     | Frameshift      | CCD1     | ALS               |           |        |      |                            |                     | [6, 78]            |
| p.C423Lfs    | Deletion        | CCD1     | ALS               |           |        |      |                            |                     | [6, 79]            |
| p.R440Q      | Missense        | CCD1     | ALS               | 0.997     | 1.29   | 0.03 |                            |                     | [6, 78, 79]        |
| p.R440X      | Nonsense        | CCD1     | ALS, ALS-FTD, FTD |           |        |      | 47, 58, 73                 | 13, 3, 4            | [6, 7, 18, 78, 79] |
| p.R444X      | Nonsense        | CCD1     | ALS               |           |        |      | 57                         | 2                   | [6, 15, 78, 79]    |
| p.R444Q      | Missense        | CCD1     | ALS               | 0.997     | 0.73   | 0.28 | 72                         | 1                   | [17]               |
| p.I450KfsX15 | Deletion        | CCD1     | ALS, ALS-FTD      |           |        |      | 57, 71, 77, 71, 51, 55, 54 | 2, 3, 1, 2, 2, 3, 3 | [7, 78, 79]        |
| p.T462fs     | Frameshift      | CCD1     | ALS               |           |        |      |                            |                     | [6, 78]            |
| p.E463Sfs    | Deletion        | CCD1     | ALS               |           |        |      |                            |                     | [6, 79]            |
| p.C471Y      | Missense        | CCD1     | ALS               | 0.886     | 2.08   | 0.08 |                            |                     | [6, 78, 79]        |
| p.V479EfsX4  | Deletion        | CCD1     | ALS-FTD           |           |        |      | 65, 58                     | 1, 3                | [7, 78, 79]        |
| p.Y482X      | Nonsense        | CCD1     | ALS-FTD           |           |        |      |                            |                     | [18, 78, 79]       |
| p.S499X      | Nonsense        | CCD1     | ALS               |           |        |      |                            |                     | [6, 78, 79]        |
| p.D500fs     | Frameshift      | CCD1     | ALS               |           |        |      |                            |                     | [6]                |
| p.I501Kfs    | Insertion       | CCD1     | ALS               |           |        |      |                            |                     | [6, 78, 79]        |
| p.I515T      | Missense        | CCD1     | ALS               | 0.002     | 0.78   | 0.48 | 59                         | 10                  | [19, 78, 79]       |
| p.S518LfsX32 | Insertion       | CCD1     | ALS               |           |        |      | 64                         | 1                   | [19, 78]           |
| p.I522M      | Missense        | CCD1     | ALS               | 0.929     | 1.99   | 0.11 |                            |                     | [6, 78, 79]        |
| p.A535T      | Missense        | CCD1     | FTD               | 0.000     | 1.71   | 0.44 | 52                         | 10                  | [19, 78, 79]       |
| p.E550fs     | Frameshift      | CCD1     | ALS               |           |        |      |                            |                     | [6, 78]            |
| p.L552Tfs    | Insertion       | CCD1     | ALS               |           |        |      |                            |                     | [6, 79]            |
| p.M559R      | Missense        | CCD1     | ALS               | 0.012     | -0.51  | 0.00 | 60                         | 6                   | [7, 78, 79]        |
| p.Q565P      | Missense        | CCD1     | ALS               | 0.990     | -1.26  | 0.01 |                            |                     | [6, 78, 79]        |

| Mutation     | Type of Variant | Location | Disease           | PolyPhen2 | SNPs3D | SIFT | Age of onset                       | Survival Time                      | Refs            |
|--------------|-----------------|----------|-------------------|-----------|--------|------|------------------------------------|------------------------------------|-----------------|
| p.A571V      | Missense        | CCD1     | ALS               | 0.455     | -0.39  | 0.26 |                                    |                                    | [6, 79]         |
| p.R574Sfs    | Splice          | CCD1     | ALS               |           |        |      |                                    |                                    | [6, 79]         |
| p.Q581H      | Missense        | CCD1     | ALS               | 0.990     | -1.71  | 0.01 |                                    |                                    | [6, 78, 79]     |
| p.587sp      | Splice          | CCD1     | ALS               |           |        |      |                                    |                                    | [6, 78]         |
| p.M598V      | Missense        | CCD1     | ALS               | 0.001     | 1.09   | 0.31 |                                    |                                    | [6, 78, 79]     |
| p.Q629fs     | Deletion        | CCD1     | ALS               |           |        |      |                                    |                                    | [6, 78, 79]     |
| p.E640del    | Deletion        | CCD1     | ALS               |           |        |      |                                    |                                    | [6, 78]         |
| p.E643del    | Deletion        | CCD1     | ALS, ALS-FTD, FTD |           |        |      | 69, 62, 62, 63, 41, 63, 64, 70, 69 | 3, 11, 11, 3, 1, 6, 13, 1, 9, 6, 7 | [7, 19, 78, 79] |
| p.653sp      | Splice          | CCD1     | ALS-FTD           |           |        |      |                                    |                                    | [6, 78]         |
| p.L654Vfs    | Splice          | CCD1     | ALS-FTD           |           |        |      |                                    |                                    | [18, 79]        |
| p.Q655X      | Nonsense        | CCD1     | ALS-FTD           |           |        |      |                                    |                                    | [6, 18, 78, 79] |
| p.M662T      | Missense        | CCD2     | ALS-FTD           | 0.004     | 0.76   | 0.49 |                                    |                                    | [18, 78, 79]    |
| p.M690fs     | Frameshift      | CCD2     | ALS-FTD           |           |        |      |                                    | 9                                  | [17]            |
| p.690-713del | Splice          | CCD2     | ALS, ALS-FTD, FTD |           |        |      | 63, 52, 74, 65, 52, 64, 78, 65     | 4, 2, 1, 5, 1, 3, 2                | [7, 78, 79]     |
| p.E696K      | Missense        | CCD2     | ALS-FTD, FTD      | 0.734     | 0.32   | 0.04 | 78                                 | 6                                  | [7, 20, 78, 79] |
| p.I710N      | Missense        | CCD2     | ALS               | 0.790     | -0.75  | 0.00 |                                    |                                    | [6, 78, 79]     |

### Additional references

78. Ahmad L, Zhang SY, Casanova JL, Sancho-Shimizu V: Human TBK1: A Gatekeeper of Neuroinflammation. Trends in molecular medicine 2016, 22(6):511-527.

79. Freischmidt A, Muller K, Ludolph AC, Weishaupt JH, Andersen PM: Association of Mutations in TBK1 With Sporadic and Familial Amyotrophic Lateral Sclerosis and Frontotemporal Dementia. JAMA neurology 2016.

#### Prediction tools

PolyPhen2  
 1 = probably damaging  
 0 = benign  
 middle = possibly damaging

SNPs3D  
 Non-deleterious = +  
 Deleterious = -  
 Larger the score = more confident

SIFT  
 Deleterious = <0.05

|  |        |
|--|--------|
|  | low    |
|  | medium |
|  | high   |
